# Supplementary material
Source: Springer Nature journal article supplement (https://www.springermedizin.de/resource/supplementary/12958_2009_509_MOESM1_ESM.pdf/9568176)

*Cyp19a1* mRNA level

1000000  
100000  
10000  
1000  
100  
10  
1

Male gonadal  
fat

Ovary

Testis

Male  
hypothalamus

Female  
hypothalamus

Male  
pituitary

Female  
pituitary

Epididymis

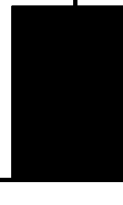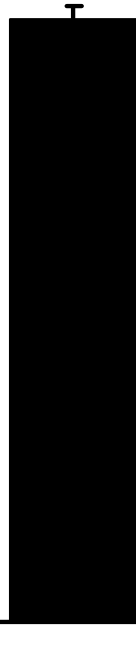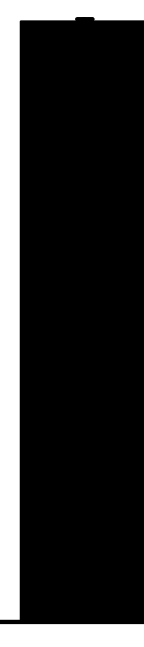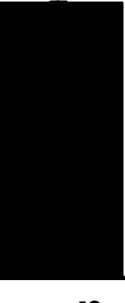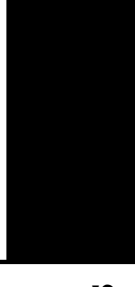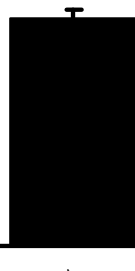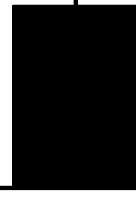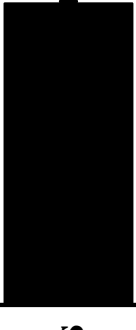

Supplement: MOESM1 [file 9568176]
